# Supplementary material for: Adjunctive use of essential oils following scaling and root planing –a randomized clinical trial
Source: Springer Nature journal article supplement (doi:10.1186/s12906-016-1117-x), 2016-06-07
Supplement: MOESM1 [file 10244246]

## Trial Description

### Title

**Adjunctive use of essential oils following Scaling and root planing**

### Trial Acronym

**essential oils**

### URL of the trial

**http://nicht vorhanden**

### Brief Summary in Lay Language

**[--]\***

### Brief Summary in Scientific Language

**The study deals with scaling and root planing in periodontitis patients. In a randomized double-blind study we want to check if there is a benefit of the adjunctive use of essential oils during and after scaling and root planing for the improvement of clinical variables as well as at periodontopathogenic bacteria.**

## Organizational Data

- DRKS-ID: **DRKS00009387**
- Date of Registration in DRKS: **2015/09/30**
- Date of Registration in Partner Registry or other Primary Registry: **2012/09/24**
- Investigator Sponsored/Initiated Trial (IST/IIT): **yes**
- Ethics Approval/Approval of the Ethics Committee: **Approved**
- (leading) Ethics Committee Nr.: **332-12-24092012 , Ethikkommission an der Medizinischen Fakultät der Universität Leipzig**

## Secondary IDs

## Health condition or Problem studied

- ICD10: **K05.3 - Chronic periodontitis**

## Interventions/Observational Groups

- Arm 1: **scaling and root planing with essential oils**
- Arm 2: **scaling and root planing without essential oils**

## Characteristics

- Study Type: **Interventional**
- Study Type Non-Interventional: **[---]\***
- Allocation: **Randomized controlled trial**
- Blinding: **[---]\***
- Who is blinded: **investigator/therapist, assessor, data analyst**
- Control: **Active control (effective treatment of control group)**
- Purpose: **Treatment**
- Assignment: **Parallel**
- Phase: **N/A**
- Off-label use (Zulassungsüberschreitende Anwendung eines Arzneimittels): **N/A**

### Primary Outcome

**probing depth measured with a manual periodontometer at baseline as well as after three and six months**

### Secondary Outcome

**attachment level, bleeding on probing, periodontopathogenic bacteria**

## Countries of recruitment

- DE **Germany**

## Locations of Recruitment

- Doctor's Practice **Hamburg**

## Recruitment

- Planned/Actual: **Actual**

Planned/Actual: **Actual**

- (Anticipated or Actual) Date of First Enrollment: **2013/04/02**
- Target Sample Size: **50**
- Monocenter/Multicenter trial: **Monocenter trial**
- National/International: **National**

#### Inclusion Criteria

- Gender: **Both, male and female**
- Minimum Age: **40 Years**
- Maximum Age: **65 Years**

#### Additional Inclusion Criteria

**generalized moderate periodontitis, no antibiotic use within the 1st six months**

#### Exclusion criteria

**Pregnancy, breastfeeding and allergy to the ingredients of the herbal distillate products**

#### Addresses

- **Primary Sponsor**

**Institut für Mikroökologie und SymbioVaccin  
35745 Herborn  
Germany**

Telephone: [---]\*

Fax: [---]\*

E-mail: [---]\*

URL: [---]\*

■ **Contact for Scientific Queries**

**MVZ Institut für Mikroökologie**  
**Mr. Priv.-Doz. Dr. Andreas Schwiertz**  
**Auf den Lüppen 8**  
**35745 Herborn**  
**Germany**

Telephone: **02772981139**

Fax: [---]\*

E-mail: **andreas.schwiertz at mikrooek.de**

URL: [---]\*

■ **Contact for Public Queries**

**Universitätsklinikum Leipzig AöR**  
**Mr. Prof. Dr. Dr. h.c. Holger Jentsch**  
**Liebigstr. 12, Haus 1**  
**04105 Leipzig**  
**Germany**

Telephone: **0341-9721208**

Fax: [---]\*

E-mail: **jenh at medizin.uni-leipzig.de**

URL: [---]\*

## Sources of Monetary or Material Support

■ **Institutional budget, no external funding (budget of sponsor/PI)**

**Universität Leipzig**  
**Liebigstr. 12, Haus 1**  
**04105 Leipzig**  
**Germany**

Telephone: [---]\*

Fax: [---]\*

E-mail: [---]\*

URL: [---]\*

■ **Commercial (pharmaceutical industry, medical engineering industry, etc.)**

**SymbioVaccin Gesellschaft für Diagnostik**

**Auf den Lüppen 8**

**35745 Herborn**

**Germany**

Telephone: [---]\*

Fax: [---]\*

E-mail: [---]\*

URL: [---]\*

## Status

- Recruitment Status: **Recruiting complete, follow-up complete**
- Study Closing (LPLV): **2014/09/28**

## Trial Publications, Results and other documents

*\* This entry means the parameter is not applicable or has not been set.*
